# Supplementary material for: Computational drug repurposing strategy predicted peptide-based drugs that can potentially inhibit the interaction of SARS-CoV-2 spike protein with its target (humanACE2)
Source: PubMed Central journal article supplement (PMC7793299; doi:10.1371/journal.pone.0245258), 2021-01-08
Supplement: pone.0245258.s001.pdf [file pone.0245258.s001.pdf]

| Name     | Structure of Structure                                                               | Poses    | S score    |
|----------|--------------------------------------------------------------------------------------|----------|------------|
| Atosiban | 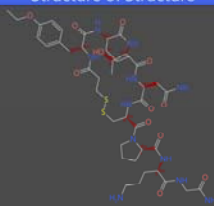   | C Pose 1 | -9.9765167 |
| Atosiban |    | C Pose 2 | -8.3580637 |
| Atosiban |    | C Pose 3 | -8.0395441 |
| Atosiban |    | C Pose 4 | -7.7653613 |
| Atosiban |   | C Pose 5 | -7.6741271 |
| BV2      |  | C Pose 1 | -10.552872 |
| BV2      |  | C Pose 2 | -9.9645472 |
| BV2      |  | C Pose 3 | -9.7060776 |
| BV2      |  | C Pose 4 | -9.6723614 |

| Name      | Structure of Structure                                                               | Poses    | S score    |
|-----------|--------------------------------------------------------------------------------------|----------|------------|
| BV2       | 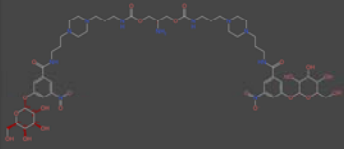   | C Pose 5 | -9.6440516 |
| Bleomycin |    | [ Pose 1 | -9.7330208 |
| Bleomycin |    | [ Pose 2 | -9.5062265 |
| Bleomycin |    | [ Pose 3 | -9.437006  |
| Bleomycin |   | [ Pose 4 | -9.2959585 |
| Bleomycin |  | [ Pose 5 | -9.2261534 |
| EXPT00686 |  | F Pose 1 | -7.6593571 |
| EXPT00686 |  | F Pose 2 | -7.5369987 |
| EXPT00686 |  | F Pose 3 | -7.4847755 |

| Name        | Structure of Structure                                                               | Poses    | S score    |
|-------------|--------------------------------------------------------------------------------------|----------|------------|
| EXPT00686   | 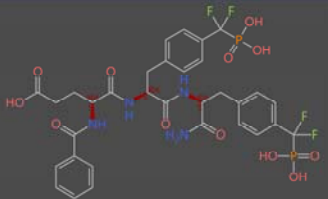   | F Pose 4 | -7.3919034 |
| EXPT00686   |    | F Pose 5 | -7.3577948 |
| EXPT00779   |    | C Pose 1 | -10.334968 |
| EXPT00779   |    | C Pose 2 | -9.976676  |
| EXPT00779   |   | C Pose 3 | -9.7267323 |
| EXPT00779   |  | C Pose 4 | -9.5788488 |
| EXPT00779   |  | C Pose 5 | -9.3824739 |
| Felypressin |  | C Pose 1 | -8.3267183 |
| Felypressin |  | C Pose 2 | -8.2110882 |

| Name                       | Structure of Structure                                                               | Poses    | S score    |
|----------------------------|--------------------------------------------------------------------------------------|----------|------------|
| Felypressin                | 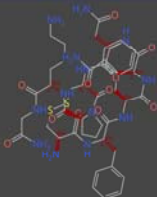  | C Pose 3 | -7.9180994 |
| Felypressin                |   | C Pose 4 | -7.7593579 |
| Felypressin                |   | C Pose 5 | -7.3589697 |
| Glycinamide Ribonucleotide |    | F Pose 1 | -5.5818815 |
| Glycinamide Ribonucleotide |   | F Pose 2 | -5.3548274 |
| Glycinamide Ribonucleotide |  | F Pose 3 | -5.2006378 |
| Glycinamide Ribonucleotide |  | F Pose 4 | -5.1935925 |
| Glycinamide Ribonucleotide |  | F Pose 5 | -5.130796  |
| Gonadorelin                |  | C Pose 1 | -9.8081579 |

| Name        | Structure of Structure                                                               | Poses    | S score    |
|-------------|--------------------------------------------------------------------------------------|----------|------------|
| Gonadorelin | 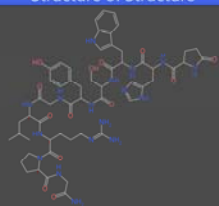   | C Pose 2 | -9.7502747 |
| Gonadorelin |    | C Pose 3 | -9.4416246 |
| Gonadorelin |    | C Pose 4 | -9.4041004 |
| Gonadorelin |    | C Pose 5 | -9.3112593 |
| Icatibant   |   | C Pose 1 | -9.6560278 |
| Icatibant   |  | C Pose 2 | -9.6064682 |
| Icatibant   |  | C Pose 3 | -9.5559416 |
| Icatibant   |  | C Pose 4 | -9.4601755 |
| Icatibant   |  | C Pose 5 | -9.1451349 |

| Name                                                                | Structure of Structure                                                               | Poses    | S score    |
|---------------------------------------------------------------------|--------------------------------------------------------------------------------------|----------|------------|
| Mixed Carbamic Phosphoric Acid Anhydride of 7 8-Diaminononanic Acid | 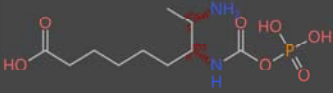   | F Pose 1 | -5.7086005 |
| Mixed Carbamic Phosphoric Acid Anhydride of 7 8-Diaminononanic Acid |    | F Pose 2 | -5.7007484 |
| Mixed Carbamic Phosphoric Acid Anhydride of 7 8-Diaminononanic Acid |    | F Pose 3 | -5.5531178 |
| Mixed Carbamic Phosphoric Acid Anhydride of 7 8-Diaminononanic Acid |    | F Pose 4 | -5.4036312 |
| Mixed Carbamic Phosphoric Acid Anhydride of 7 8-Diaminononanic Acid |   | F Pose 5 | -5.4000859 |
| Nafarelin                                                           |  | C Pose 1 | -9.7678156 |
| Nafarelin                                                           |  | C Pose 2 | -9.5953712 |
| Nafarelin                                                           |  | C Pose 3 | -9.5231056 |
| Nafarelin                                                           |  | C Pose 4 | -9.3676577 |

| Name                                           | Structure of Structure                                                               | Poses    | S score    |
|------------------------------------------------|--------------------------------------------------------------------------------------|----------|------------|
| Nafarelin                                      | 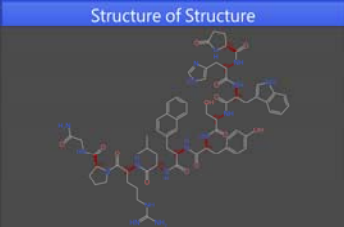    | C Pose 5 | -9.1661434 |
| P1-(adenosine-5'-P5-(uridine-5')pentaphosphate |    | F Pose 1 | -9.0627356 |
| P1-(adenosine-5'-P5-(uridine-5')pentaphosphate |    | F Pose 2 | -8.5044508 |
| P1-(adenosine-5'-P5-(uridine-5')pentaphosphate |    | F Pose 3 | -8.4444618 |
| P1-(adenosine-5'-P5-(uridine-5')pentaphosphate |   | F Pose 4 | -8.3571167 |
| P1-(adenosine-5'-P5-(uridine-5')pentaphosphate |  | F Pose 5 | -8.232872  |
| Sar9 Met (O2)11-Substance P                    |  | Σ Pose 1 | -10.627931 |
| Sar9 Met (O2)11-Substance P                    |  | Σ Pose 2 | -10.590092 |
| Sar9 Met (O2)11-Substance P                    |  | Σ Pose 3 | -10.522081 |

| Name                        | Structure of Structure                                                               | Poses    | S score    |
|-----------------------------|--------------------------------------------------------------------------------------|----------|------------|
| Sar9 Met (O2)11-Substance P | 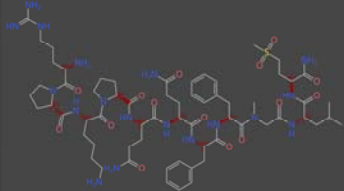   | 5 Pose 4 | -10.442977 |
| Sar9 Met (O2)11-Substance P |    | 5 Pose 5 | -10.328358 |
| Serine-3'-aminoadenosine    |    | 1 Pose 1 | -5.8694892 |
| Serine-3'-aminoadenosine    |    | 2 Pose 2 | -5.8109426 |
| Serine-3'-aminoadenosine    |   | 3 Pose 3 | -5.7011609 |
| Serine-3'-aminoadenosine    |  | 4 Pose 4 | -5.6868701 |
| Serine-3'-aminoadenosine    |  | 5 Pose 5 | -5.6719384 |
| Thymopentin                 |  | 1 Pose 1 | -7.547617  |
| Thymopentin                 |  | 2 Pose 2 | -7.3551712 |



| Name                                           | Structure of Structure                                                               | Poses    | S score    |
|------------------------------------------------|--------------------------------------------------------------------------------------|----------|------------|
| Thymopentin                                    | 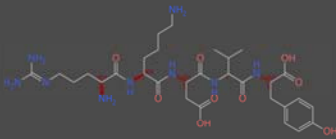   | C Pose 3 | -7.2386456 |
| Thymopentin                                    |    | C Pose 4 | -6.8311429 |
| Thymopentin                                    |    | C Pose 5 | -6.7853174 |
| p1-(5'-adenosyl)p5-(5'-thymidyl)pentaphosphate |    | F Pose 1 | -8.6776609 |
| p1-(5'-adenosyl)p5-(5'-thymidyl)pentaphosphate |   | F Pose 2 | -8.5978622 |
| p1-(5'-adenosyl)p5-(5'-thymidyl)pentaphosphate |  | F Pose 3 | -8.2300749 |
| p1-(5'-adenosyl)p5-(5'-thymidyl)pentaphosphate |  | F Pose 4 | -8.2097178 |
| p1-(5'-adenosyl)p5-(5'-thymidyl)pentaphosphate |  | F Pose 5 | -8.1676407 |
